# Levels of Angiotensin-Like-2 Are Positively Associated With Aortic Stiffness and Mortality After Kidney Transplantation

Marie-Pier Desjardins,<sup>1</sup> Nathalie Thorin-Trescases,<sup>2</sup> Aboubacar Sidibé,<sup>1</sup> Catherine Fortier,<sup>1</sup> Sacha A. De Serres,<sup>1</sup> Richard Larivière,<sup>1</sup> Eric Thorin,<sup>2,\*</sup> and Mohsen Agharazii<sup>1,\*</sup>

## BACKGROUND

Angiotensin-like-2 (ANGPTL2) is a secreted proinflammatory glycoprotein that promotes endothelial dysfunction, atherosclerosis, and cardiovascular disease (CVD). Circulating ANGPTL2 is increased in chronic kidney disease (CKD), where the risk of CVD is amplified. The objectives of the present study were to (i) examine whether kidney transplantation (KTx) reduces ANGPTL2 levels, (ii) identify the determinants of ANGPTL2 after KTx, (iii) study the association of ANGPTL2 with aortic stiffness, and (iv) assess the impact of ANGPTL2 on mortality after KTx.

## METHODS

In 75 patients, serum ANGPTL2 levels were measured at baseline and 3 months after KTx. Aortic stiffness was determined by carotid-femoral pulse wave velocity, glomerular filtration rate was estimated by CKD-EPI formula, and serum cytokines and endothelin-1 levels were determined 3 months after KTx. Survival analysis was performed using Kaplan–Meier and Cox regression after a median follow-up of 90 months.

## RESULTS

After 3 months of KTx, ANGPTL2 levels decreased from 71 ng/ml (53–95) to 11 ng/ml (9–15) ( $P < 0.001$ ). In multivariate analysis, age, lower renal function, and endothelin-1 were independently associated with higher post-KTx ANGPTL2 levels. ANGPTL2 was positively associated with aortic stiffness after KTx, even when adjusted for mean blood pressure (standardized  $\beta = 0.314$ ;  $P = 0.008$ ). During follow-up, 13 deaths occurred. The group of patients with higher post-KTx ANGPTL2 levels had a hazard ratio for mortality of 3.9 (95% confidence interval: 1.07–14.4;  $P = 0.039$ ).

## CONCLUSION

KTx significantly reduced serum ANGPTL2 levels. The positive association between post-KTx ANGPTL2, aortic stiffness and mortality, suggests that ANGPTL2 may play a biological role in CKD-related CVD.

**Keywords:** angiotensin-like-2; aortic stiffness; blood pressure; chronic kidney disease; hypertension; kidney transplantation; mortality.

doi:10.1093/ajh/hpw208

Cardiovascular disease (CVD) is the leading cause of mortality in patients with chronic kidney disease (CKD).<sup>1–3</sup> However, this increased cardiovascular mortality risk cannot be entirely explained by traditional risk factors.<sup>1</sup> Studies have shown an association between vascular stiffness, a nontraditional risk factor, and high rate mortality in CKD patients.<sup>4–6</sup> The accelerated progression of aortic stiffness can result from exposure to previous traditional cardiovascular risk factors, but could also come from endothelial dysfunction, inflammation, accumulation of advanced glycation end-products and vascular calcification.<sup>7–10</sup> Angiotensin-like-2 (ANGPTL2), a secreted glycoprotein that belongs to the angiotensin-like family, is a novel proinflammatory mediator. It promotes endothelial dysfunction, atherosclerosis, and inflammation through an autocrine/paracrine pathway on endothelial cells.<sup>11–13</sup> The clinical importance of ANGPTL2 has been underlined by several studies. First, in the elderly

without CVD, serum ANGPTL2 levels were reported to be associated with the presence of both plaque and intimal-media thickness.<sup>13</sup> Second, in diabetic patients without CVD, a positive correlation between ANGPTL2 levels and intimal-media thickness was also reported.<sup>14</sup> Third, in the general population, high ANGPTL2 levels were associated with lower renal function and increased risk of developing CVD.<sup>15,16</sup> Finally, in diabetic patients with CKD, we reported that ANGPTL2 levels are associated with an increased risk of death related to cardiovascular events.<sup>17</sup> Altogether, these data suggest that high ANGPTL2 circulating levels are detrimental for renal and cardiovascular functions.

The reduction of ANGPTL2 levels after restoration of renal function by kidney transplantation (KTx), and its association with aortic stiffness and mortality remain, however, unknown. We hypothesized that high levels of ANGPTL2 associated with severely impaired renal function contribute

Correspondence: Mohsen Agharazii (Mohsen.Agharazii@crhdq.ulaval.ca).

Initially submitted September 24, 2016; date of first revision December 14, 2016; accepted for publication January 5, 2017; online publication February 3, 2017.

<sup>1</sup>CHU de Québec Research Center, L'Hôtel-Dieu de Québec hospital, Division of Nephrology, Department of medicine, Faculty of medicine, Université Laval, Québec City, Québec, Canada; <sup>2</sup>Université de Montréal, Montreal Heart Institute, Department of Surgery, Montréal, Québec, Canada.

\*These two authors equally contributed to this work.

© The Author(s) 2017. Published by Oxford University Press on behalf of American Journal of Hypertension, Ltd. All rights reserved. For permissions, please e-mail: journals.permissions@oup.com

to endothelial dysfunction, vascular disease, and mortality in patients with severe CKD. Therefore, the objectives of the present study were to examine the impact of KTx on the circulating levels of ANGPTL2, to identify the determinants of ANGPTL2 after KTx, and to examine its association with vascular stiffness and mortality.

## METHODS

### Study design and patient population

This is an observational study involving patients with stage-5 kidney disease who were undergoing KTx. All adult patients who were offered KTx at CHU de Québec between September 2007 and October 2011 were eligible. The inclusion and exclusion criteria of these subjects have been previously reported.<sup>10,18</sup> In brief, all patients were adults, with end-stage kidney disease, and were on chronic dialysis with palpable brachial, femoral, and carotid pulse so as to obtain a reliable reading of hemodynamic parameters.<sup>10,18</sup> Furthermore, subjects with a graft failure in need of dialysis by 3 months post-transplantation were excluded for the analysis. The protocol was approved by the Institutional Review Board (Comité d'Éthique de la recherche du CHU de Québec-Université Laval) and the study was conducted in accordance to the Declaration of Helsinki. All patients provided informed written consent.

During this period, 212 patients received a renal transplantation, 124 patients were not approached to participate because of the lack of time or personnel to enroll patients before surgery. Therefore, 88 patients were approached, met the inclusion criteria and were enrolled. Among these, 13 patients were excluded for the following reasons: consent withdrawal ( $n = 5$ ), graft failure that required dialysis 3 months after KTx ( $n = 4$ ), and absence of blood samples ( $n = 4$ ). The analysis was therefore performed on 75 patients undergoing a KTx (Figure 1). All patients were treated

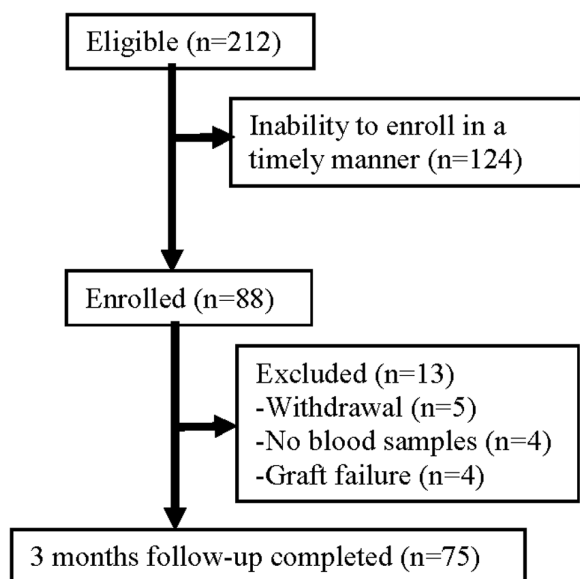

**Figure 1.** Study flowchart.

with a standard immunosuppressive regimen composed of tacrolimus, mycophenolate mofetil, and corticosteroids. There were 16 living-donors KTx, 59 cadaveric donors, and 15 dual KTx. All patients underwent clinical, biochemical, hemodynamic, and pharmacological evaluations 3 months post-KTx. For survival analysis, there was no loss to follow-up and the vital status was assessed up to June 2016, for a median follow-up of 90 months (79–95).

### Hemodynamic parameters

Hemodynamic measurements were assessed after a 15-minute rest period in a supine position. Carotid-femoral pulse wave velocity (cf-PWV) was evaluated using Complior SP (Artech Medical, Pantin, France) as previously described.<sup>10</sup> Brachial blood pressure (BP) was determined with an automatic oscillometric sphygmomanometer BPM-100 (BP-Tru, Coquitlam, Canada). Central BP was determined using generalized transfer function of radial artery waveform, obtained through tonometry (Sphygocor) after calibration using brachial systolic and diastolic BP. In patients with arteriovenous fistula, all measurements were performed on the contralateral side.

### Biological parameters

Serum samples were immediately centrifuged and stored at  $-80^{\circ}\text{C}$ . Endothelin-1 and pentosidine were measured as previously described.<sup>10,18</sup> Serum cytokines profile (IFN $\gamma$ , IL-1 $\alpha$ , IL-1 $\beta$ , IL-2, IL-4, IL-6, IL-8, IL-10, IL-12, and TNF $\alpha$ ) was measured by ELISA using a Ciraplex Human Cytokine 10-Plex Array (Aushon BioSystems, Billerica, MA). Serum ANGPTL2 level was measured by ELISA using a kit for human Angiopoietin-like-protein 2 (#SEB919Hu) (Cloud-Clone Corporation, Houston, TX) as previously described.<sup>17,19</sup>

### Statistical analysis

Data are presented as mean  $\pm$  SD or median (25<sup>th</sup>–75<sup>th</sup> percentiles). Data that were not normally distributed were log transformed where indicated. Kruskal–Wallis was used to examine the differences in the levels of ANGPTL2 with respect to the cause of renal disease. Changes of ANGPTL2 levels after KTx were tested using Wilcoxon rank test. Independent Student  $t$ , Mann–Whitney  $U$  test, or chi square was used as appropriated to examine differences between subjects according to the median level of ANGPTL2. Determinants of ANGPTL2 were further examined using forward conditional logistic regression. Survival analysis was performed using Kaplan–Meier and Cox regression analysis. Analysis was performed using SPSS 23.

## RESULTS

The baseline characteristics of the patients who underwent KTx and were dialysis-independent by the third month post-KTx are presented in Table 1. Three months after KTx, the levels of ANGPTL2 decreased significantly from 71 ng/

ml (53–95) to 11 ng/ml (9–15) ( $P < 0.001$ ), as shown in Figure 2.

Three months after KTx, the group of patients with higher ANGPTL2 levels (>median of 11 ng/ml) were older, had a lower estimated glomerular filtration rate and a higher prevalence of diabetes and CVD (Table 2). In addition, among the hemodynamic parameters, cf-PWV, and central pulse

**Table 1.** Baseline characteristics at the time of transplantation

| Parameters                           | n = 75      |
|--------------------------------------|-------------|
| Male                                 | 52 (69)     |
| Age (year)                           | 50 ± 14     |
| Weight (kg)                          | 73.8 ± 13.8 |
| Body mass index (kg/m <sup>2</sup> ) | 26.3 ± 4.5  |
| Hypertension                         | 72 (96)     |
| Smoking <sup>a</sup>                 | 52 (69)     |
| Diabetes                             | 21 (28)     |
| CVD                                  | 18 (24)     |
| Dialysis vintage (months)            | 60 [13–75]  |
| Primary renal disease                |             |
| Diabetes                             | 17 (23)     |
| Vascular disease                     | 7 (9)       |
| Others                               | 51 (68)     |
| Pharmacological profile              |             |
| ACEi/ARB                             | 46 (61)     |
| Statins                              | 56 (75)     |

Results are mean ± SD, median [25<sup>th</sup>–75<sup>th</sup> percentiles] or n (%). Abbreviations: ACEi, angiotensin-converting enzyme inhibitor; ARB, angiotensin receptor blockers; CVD, cardiovascular disease.

<sup>a</sup>Smoking (active or past history).

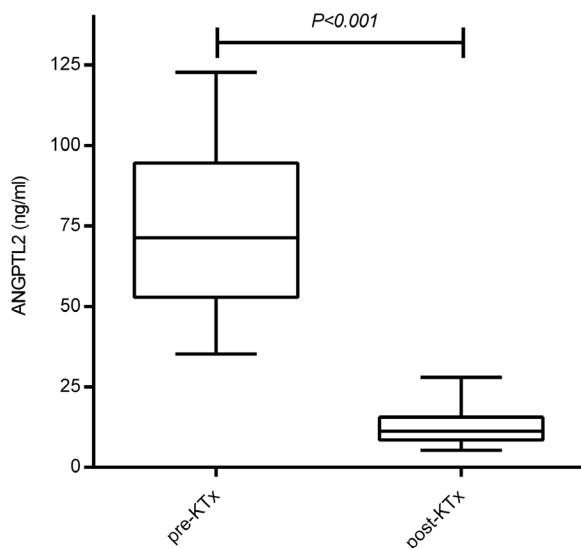

**Figure 2.** Levels of ANGPTL2 before and 3 months after kidney transplantation. Boxplots graph shows a significant reduction of angiotensin-like-2 (ANGPTL2) after kidney transplantation (whiskers represent 5<sup>th</sup> and 95<sup>th</sup> percentiles).

pressure were higher in the group with higher ANGPTL2 levels (Table 2). There was also a higher level of circulating endothelin-1 in the group with higher ANGPTL2 levels (Table 2). Finally, lower HDL and higher TG levels were observed in patients with higher ANGPTL2 levels (Table 2). However, no association between circulating cytokines levels and the levels of ANGPTL2 was found (Table 2). We found no differences in the levels of ANGPTL2 and the cause of kidney disease at baseline (diabetes: 71 ± 6; vascular disease: 73 ± 9; others: 77 ± 5 ( $P = 0.897$ )). But there was a slightly higher level of ANGPTL2 in patients with diabetic kidney disease at 3 months post-transplant (diabetes: 16 ± 2; vascular disease: 13 ± 2; others: 12 ± 1 ( $P = 0.019$ )).

In a multiple logistic regression analysis, using a forward conditional approach, only age, estimated glomerular filtration rate, and endothelin-1 were independently associated with higher levels of ANGPTL2, whereas prevalence of CVD and diabetes were excluded from the model based on statistical criteria (Table 3). This association remained the same even after incorporation of cause of renal diseases into the model.

Figure 3 shows a positive relationship between aortic stiffness assessed by cf-PWV and ANGPTL2 levels measured 3 months after KTx. In a linear regression analysis, ANGPTL2 was positively associated with aortic stiffness assessed by cf-PWV (standardized  $\beta = 0.280$ ;  $P = 0.015$ ) and with central pulse pressure (standardized  $\beta = 0.269$ ;  $P = 0.02$ ). Adjustment for mean BP did not affect the relationships between ANGPTL2 and aortic stiffness assessed by cf-PWV (standardized  $\beta = 0.314$ ;  $P = 0.008$ ) and central pulse pressure (standardized  $\beta = 0.290$ ;  $P = 0.02$ ). However, after adjustment for age, this relationship was no longer statistically significant ( $P = 0.46$ ).

After a median follow-up of 90 months (79–95), 13 (17%) deaths occurred. Figure 4 shows that post-KTx ANGPTL2 levels above median were significantly associated with a higher mortality ( $P = 0.0263$ ). In a Cox regression analysis, the hazard ratio for mortality in the group of higher ANGPTL2 was 3.9 (95% confidence interval: 1.07–14.4;  $P = 0.039$ ). Because of low number of events, further adjustment was not possible. Table 4 shows the relative importance of each parameter and its relation to mortality using a univariate Cox regression analysis.

## DISCUSSION

This study demonstrates for the first time that circulating levels of ANGPTL2 are extremely elevated in patients with stage-5 CKD, but KTx strongly reduces ANGPTL2 levels, indicating that the kidney is a source of ANGPTL2. Most importantly, it shows that, after KTx, ANGPTL2 levels are positively associated with aortic stiffness, central pulse pressure, renal function and mortality, independently of the inflammatory status of the patient, suggesting that ANGPTL2 may play a biological role in CKD-related CVD. ANGPTL2 is a proinflammatory circulating protein with structural homology to the angiotensins: similarly to the latter, ANGPTL2 is composed of a N-terminal coiled-coil domain and a C-terminal fibrinogen-like domain, but it

**Table 2.** Clinical, hemodynamic, and biochemical parameters 3 months post-transplantation

| Parameters                           | Total, n = 75 | ANGPTL2 ≤ median, n = 38 | ANGPTL2 > median, n = 37 | P value          |
|--------------------------------------|---------------|--------------------------|--------------------------|------------------|
| Demographic                          |               |                          |                          |                  |
| Male                                 | 52 (69)       | 25 (66)                  | 27 (73)                  | 0.500            |
| Age (year)                           | 51 ± 14       | 45 ± 14                  | 57 ± 10                  | <b>&lt;0.001</b> |
| Clinical                             |               |                          |                          |                  |
| Weight (kg)                          | 73.4 ± 13.7   | 71.1 ± 11.2              | 75.8 ± 15.7              | 0.148            |
| Body mass index (kg/m <sup>2</sup> ) | 26.1 ± 4.6    | 25.6 ± 4.6               | 26.6 ± 4.6               | 0.346            |
| Hypertension                         | 64 (85)       | 33 (87)                  | 31 (84)                  | 0.306            |
| Smoking                              | 52 (69)       | 24 (63)                  | 28 (76)                  | 0.240            |
| Diabetes                             | 21 (28)       | 6 (16)                   | 15 (41)                  | <b>0.017</b>     |
| CVD                                  | 18 (24)       | 2 (5)                    | 16 (43)                  | <b>&lt;0.001</b> |
| Dialysis vintage (months)            | 63 ± 64       | 73.3 ± 75.4              | 56.6 ± 49.1              | 0.271            |
| eGFR (ml/min/1.73 m <sup>2</sup> )   | 61 ± 20       | 70 ± 18                  | 51 ± 17                  | <b>&lt;0.001</b> |
| Primary renal disease <b>0.026</b>   |               |                          |                          |                  |
| Diabetes                             | 17 (23)       | 4 (11)                   | 13 (35)                  |                  |
| Vascular disease                     | 7 (9)         | 3 (8)                    | 4 (11)                   |                  |
| Others                               | 51 (68)       | 31 (82)                  | 20 (54)                  |                  |
| Hemodynamic parameters               |               |                          |                          |                  |
| Heart rate (bpm)                     | 74 ± 12       | 75 ± 10                  | 73 ± 14                  | 0.391            |
| Peripheral                           |               |                          |                          |                  |
| SBP (mm Hg)                          | 123 ± 16      | 123 ± 12                 | 124 ± 19                 | 0.672            |
| DBP (mm Hg)                          | 73 ± 10       | 75 ± 9                   | 71 ± 12                  | 0.059            |
| PP (mm Hg)                           | 51 ± 14       | 48 ± 8                   | 54 ± 18                  | 0.056            |
| Central                              |               |                          |                          |                  |
| SBP (mm Hg)                          | 109 ± 15      | 109 ± 12                 | 110 ± 17                 | 0.721            |
| DBP (mm Hg)                          | 74 ± 10       | 77 ± 8                   | 71 ± 12                  | <b>0.017</b>     |
| MBP (mm Hg)                          | 89 ± 11       | 91 ± 10                  | 88 ± 13                  | 0.155            |
| PP (mm Hg)                           | 35 ± 12       | 32 ± 8                   | 39 ± 14                  | <b>0.010</b>     |
| PP amplification                     | 1.5 ± 0.2     | 1.5 ± 0.2                | 1.4 ± 0.2                | <b>0.040</b>     |
| Pulse wave velocity                  |               |                          |                          |                  |
| cf-PWV (m/s)                         | 10.6 ± 2.0    | 10.1 ± 1.9               | 11.2 ± 2.0               | <b>0.020</b>     |
| cr-PWV (m/s)                         | 8.9 ± 1.3     | 9.0 ± 1.3                | 8.7 ± 1.4                | 0.346            |
| Biochemical                          |               |                          |                          |                  |
| Total cholesterol (mmol/l)           | 4.5 ± 1.1     | 4.7 ± 1.1                | 4.4 ± 1.0                | 0.277            |
| HDL (mmol/l)                         | 1.4 ± 0.5     | 1.5 ± 0.6                | 1.2 ± 0.4                | <b>0.036</b>     |
| LDL (mmol/l)                         | 2.4 ± 0.8     | 2.5 ± 0.8                | 2.2 ± 0.8                | 0.177            |
| TG (mmol/l)                          | 1.7 ± 0.9     | 1.4 ± 0.6                | 2.0 ± 1.1                | <b>0.011</b>     |
| Pentosidine (pmol/mg)                | 55.4 ± 35.6   | 50.1 ± 34.7              | 60.3 ± 36.3              | 0.185            |
| Endothelin-1 (pg/ml)                 | 10.6 ± 3.1    | 9.5 ± 2.2                | 11.9 ± 3.5               | <b>&lt;0.001</b> |
| ANGPTL2 (ng/ml)                      | 13.1 ± 7.2    | 8.3 ± 1.7                | 18.0 ± 7.4               | <b>&lt;0.001</b> |
| Inflammatory cytokines               |               |                          |                          |                  |
| IL-1α (pg/ml)                        | 11.9 ± 17.3   | 12.5 ± 18.6              | 11.2 ± 16.1              | 0.754            |
| IL-1β (pg/ml)                        | 1.4 ± 2.6     | 1.1 ± 3.0                | 1.3 ± 2.2                | 0.843            |
| IL-2 (pg/ml)                         | 1.6 ± 2.8     | 1.5 ± 2.8                | 1.7 ± 2.8                | 0.720            |
| IL-4 (pg/ml)                         | 0.93 ± 1.86   | 0.92 ± 1.96              | 0.94 ± 1.77              | 0.976            |

Table 2. Continued

| Parameters               | Total, n = 75 | ANGPTL2 ≤ median, n = 38 | ANGPTL2 > median, n = 37 | P value |
|--------------------------|---------------|--------------------------|--------------------------|---------|
| IL-6 (pg/ml)             | 4.6 ± 4.2     | 3.9 ± 4.4                | 5.4 ± 4.0                | 0.129   |
| IL-8 (pg/ml)             | 86.6 ± 75.9   | 82.5 ± 69.0              | 90.9 ± 83.4              | 0.636   |
| IL-10 (pg/ml)            | 5.5 ± 10.7    | 5.9 ± 14.2               | 5.0 ± 5.0                | 0.730   |
| IL-12 (pg/ml)            | 23.6 ± 95.5   | 32.1 ± 130.7             | 14.6 ± 27.8              | 0.434   |
| TNFα (pg/ml)             | 5.0 ± 10.2    | 5.7 ± 12.7               | 4.2 ± 6.8                | 0.547   |
| IFNγ (pg/ml)             | 0.93 ± 1.41   | 0.92 ± 1.59              | 0.94 ± 1.21              | 0.965   |
| Pharmacological          |               |                          |                          |         |
| ACEi/ARB                 | 27 (36)       | 13 (34)                  | 14 (38)                  | 0.744   |
| Statins                  | 51 (68)       | 23 (61)                  | 28 (76)                  | 0.160   |
| Tacrolimus levels (μg/l) | 8.72 ± 2.37   | 8.66 ± 2.32              | 8.78 ± 2.46              | 0.503   |

Results are means ± SD, n (%), or median [25<sup>th</sup>–75<sup>th</sup> percentiles]. Bold numbers refer to P values of <0.05. Abbreviations: ACEi, angiotensin-converting enzyme inhibitor; ANGPTL2, angiotensin-like 2; ARB, angiotensin receptor blockers; cf-PWV, carotid-femoral pulse wave velocity; cr-PWV, carotid-radial pulse wave velocity; CVD, cardiovascular disease; DBP, diastolic blood pressure; eGFR, estimated glomerular filtration rate using CKD-EPI formula; HDL, high-density lipoprotein; IFNγ, interferon gamma; IL-, interleukin-; LDL, low-density lipoprotein; MBP, mean blood pressure; PP, pulse pressure; SBP, systolic blood pressure; Smoking, past or active history; TG, triglyceride; TNFα, tumor necrosis factor alpha.

Table 3. Determinants of ANGPTL2 after KTx

| Predictors                         | Exp (β) | 95% CI      | P value | Nagelkerke-R <sup>2</sup> |
|------------------------------------|---------|-------------|---------|---------------------------|
| Age (year)                         | 1.10    | (1.04–1.17) | 0.002   | 0.56                      |
| Endothelin-1 (pg/ml)               | 1.43    | (1.08–1.87) | 0.011   |                           |
| eGFR (ml/min/1.73 m <sup>2</sup> ) | 0.95    | (0.91–0.97) | 0.006   |                           |

Analysis performed using a forward conditional logistic regression analysis including age, cardiovascular disease, diabetes, age, eGFR (CKD-EPI formula), and endothelin-1. Abbreviations: CI, confidence interval; eGFR, estimated glomerular filtration.

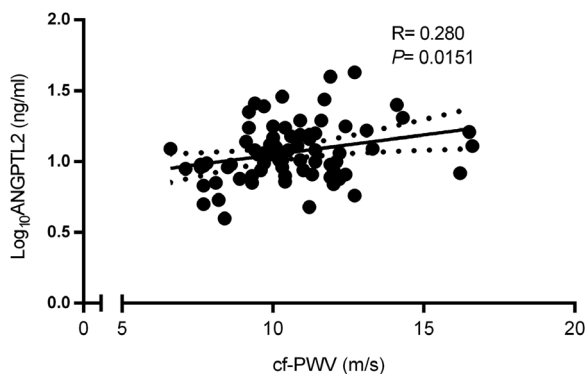

**Figure 3.** Association between angiotensin-like protein 2 and aortic stiffness after kidney transplantation. The figure shows the relationship between aortic stiffness as measured by determination of carotid-femoral pulse wave velocity (cf-PWV) and circulating ANGPTL2 (log transformed) 3 month after kidney transplantation.

does not bind to angiotensin receptors Tie1 or Tie2.<sup>20</sup> The nature of ANGPTL2 receptors is still under debate.<sup>21</sup> The first report on ANGPTL2 demonstrated that ANGPTL2 may stimulate endothelial cells through a paracrine and autocrine action.<sup>20</sup> More recent studies revealed high concentrations of

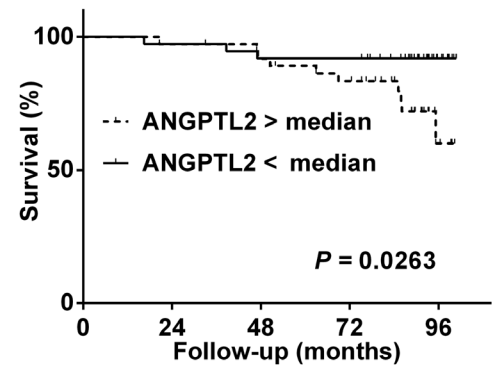

| No. at risk      | 0  | 24 | 48 | 72 | 96 |
|------------------|----|----|----|----|----|
| ANGPTL2 > median | 37 | 36 | 34 | 29 | 5  |
| ANGPTL2 < median | 38 | 37 | 34 | 34 | 12 |

**Figure 4.** Mortality and levels of angiotensin-like-2. The Kaplan–Meier analysis shows increased mortality associated with the higher ANGPTL2 level after kidney transplantation.

**Table 4.** Comparative impact of age, CVD, diabetes, levels of ANGPTL2, aortic stiffness, and renal function on overall mortality

|                                    | HR <sup>a</sup> | 95% CI       | P value      |
|------------------------------------|-----------------|--------------|--------------|
| Age (year)                         | 1.08            | (1.02–1.15)  | <b>0.008</b> |
| Diabetes                           | 6.65            | (2.04–21.72) | <b>0.002</b> |
| CVD                                | 4.80            | (1.60–14.43) | <b>0.005</b> |
| ANGPTL2 > median (ng/ml)           | 3.90            | (1.07–14.30) | <b>0.039</b> |
| cf-PWV > median (m/s)              | 14.1            | (1.80–109.0) | <b>0.011</b> |
| eGFR (ml/min/1.73 m <sup>2</sup> ) | 0.99            | (0.96–1.02)  | 0.408        |

Bold numbers refer to P values of <0.05. Abbreviations: cf-PWV, carotid-femoral pulse wave velocity; CI, confidence interval; CVD, cardiovascular disease; eGFR, estimated glomerular filtration rate using CKD-EPI formula.

<sup>a</sup>Univariate Cox regression analysis.

ANGPTL2 in endothelial cells and macrophages infiltrating atheromatous plaques and inducing vascular inflammation,



endothelial dysfunction, and atherosclerosis.<sup>11,13,22</sup> In case-control studies, circulating ANGPTL2 was higher in patients with acute coronary syndrome and heart failure.<sup>23–25</sup> In diabetes, circulating ANGPTL2 is associated with increased intima-media thickness suggesting its clinical relevance for atherosclerosis.<sup>14</sup> This is further supported by the findings of The Hisayama Study in a general Japanese community, where circulating ANGPTL2 is associated with the risk of developing CVD and type 2 diabetes.<sup>15,26</sup> Circulating levels of ANGPTL2 increase in patients with CKD 1–4 with or without type 2 diabetes.<sup>16,17,26</sup> In these studies, ANGPTL2 levels were positively correlated with albuminuria and negatively correlated with renal function estimated by estimated glomerular filtration rate. To the best of our knowledge, our study is the first to report ANGPTL2 levels in CDK-5 patients; these circulating levels (71 ng/ml, [53–95]) are extremely high when compared to those measured in patients with coronary heart disease,<sup>19</sup> acute coronary syndrome,<sup>23,25</sup> or heart failure.<sup>24</sup> It is important to note that the upper threshold for normal serum ANGPTL2 concentrations has not been defined. In healthy volunteers, circulating ANGPTL2 levels range from 1 to 3 ng/ml.<sup>19,21,25</sup> In a Japanese community, serum ANGPTL2 concentrations of 2.0–3.7 ng/ml were reported, and the risk of developing CKD was significantly higher in the highest ANGPTL2 quartile ( $\geq 3.66$  ng/ml).<sup>16</sup> In contrast to the small changes in serum ANGPTL2 reported in the literature, we previously reported high concentrations of ANGPTL2 in diabetic patients with established CKD 1–4 (ranging from 11.2 to  $>19.5$  ng/ml).<sup>17</sup> It is in accordance with a Chinese group<sup>26</sup> that also reported high ANGPTL2 levels in diabetic patients with established CKD 1–4, ranging from 2.1 to 72.3 ng/ml. It is therefore not surprising that higher levels of ANGPTL2 were measured in patients with severe CKD 5. It has indeed been proposed that reduced kidney clearance associated with CKD could cause an increase in ANGPTL2 levels,<sup>16</sup> explaining the discrepancies with other diseases and previous studies. The mechanism of ANGPTL2 clearance is, however, unknown and this hypothesis remains to be validated. In addition, the patients included in the present study were on dialysis before KTx, which could be another source to increase ANGPTL2 levels: dialysis promotes inflammation, high levels of cytokines and oxidative stress,<sup>27</sup> all known to stimulate the expression of ANGPTL2.<sup>28,29</sup> Furthermore, ANGPTL2 is a protein of  $\approx 64$  kDa, which potentially forms multimers in the circulation, making its glomerular excretion or its clearance during the dialysis likely impossible. This has never been confirmed for ANGPTL2, but angiopoietin2, a glycoprotein with similar structure and molecular weight, is not excreted, not detectable in urine and is not eliminated by dialysis.<sup>30,31</sup> Therefore, the severity of the disease and the proinflammatory environment promoting ANGPTL2 could explain the very high levels of ANGPTL2 observed in patients with CKD5 on dialysis before transplantation. Given the biological role of ANGPTL2 in atherosclerosis,<sup>11,13</sup> the increased levels of ANGPTL2 in CKD could play a significant role in CKD-related endothelial dysfunction, inflammation, and CKD-related CVD.

The fact that ANGPTL2 levels are significantly reduced and almost normalized after KTx suggests that the diseased kidney is a significant source of ANGPTL2. This is the first

report of a beneficial effect of KTx on ANGPTL2 levels. The molecular mechanisms involved in the reduction of ANGPTL2 after KTx remain to be elucidated. In our study, in patients with ANGPTL2  $>$ median 3 months after KTx, there was a higher level of serum endothelin-1, suggesting that ANGPTL2 is associated with endothelial dysfunction; this is in accordance with our previous report showing that ANGPTL2 promotes endothelial dysfunction in mice.<sup>12</sup> In addition, higher post-KTx ANGPTL2 levels were also associated with an increase in aortic stiffness as assessed by cf-PWV and by an increase in central pulse pressure; accordingly, higher post-KTx ANGPTL2 levels were associated with lower renal function. While ANGPTL2 levels have previously been associated with vascular remodelling in patients with CVD,<sup>13,14</sup> our study is the first report of an association between circulating ANGPTL2 and aortic stiffness, a process contributing to the development of structural changes associated with aging and cardiovascular events including renal failure.<sup>32</sup> Our current data linking ANGPTL2 to aortic stiffness and central pulse pressure is in agreement with our recent demonstration that levels of ANGPTL2 are positively associated with resting systolic BP.<sup>19</sup> Altogether, these data suggest that ANGPTL2 plays a biological role in CKD-related CVD. Unexpectedly, there was no significant association between ANGPTL2 and inflammation as measured by the extensive circulating cytokines levels, suggesting that the deleterious effects of ANGPTL2 are independent of these inflammatory mediators. Beside its proinflammatory properties, ANGPTL2 is also recognized for its profibrotic activity, supported by a recent study showing that ANGPTL2 combined with TGF $\beta$  contribute to renal fibrosis in mouse models, and are coexpressed in renal tubule and glomeruli of patients with fibrotic kidney diseases compared to less fibrotic kidneys.<sup>33</sup> Altogether, these data support the concept that ANGPTL2 is profibrotic in addition of its proinflammatory activity, which could contribute to renal tubule fibrosis<sup>33</sup> and possibly to large artery fibrosis and stiffening.

Finally, in a multivariable model, age, renal function, and endothelin-1 levels predicted post-KTx ANGPTL2 levels independently of diabetes and CVD in our patient population. ANGPTL2 levels were also associated with increased risk of overall mortality. This association between ANGPTL2 and mortality is in accordance with our previous report showing that in diabetic CKD 1–4 patients, ANGPTL2 is associated with an increased risk of cardiovascular events and death.<sup>17</sup>

This study has several strengths as it evaluates the impact of ANGPTL2 in a well-characterized population in terms of comorbidities, hemodynamic parameters, circulating cytokine profile, and mortality. However, there are some limitations in the present study that are mainly related to a relatively small sample size. As such, the number of deaths were small and did not allow to properly study the impact of ANGPTL2 on mortality while taking into account potential confounders.

In conclusion, this is the first study to show that circulating ANGPTL2 levels improve rapidly and significantly after successful KTx. Nonetheless, post-KTx ANGPTL2 levels are associated with higher endothelin-1 levels, aortic stiffness, renal function, and mortality, suggesting that ANGPTL2 plays an active role in CVD associated with kidney disease.

## ACKNOWLEDGMENTS

All patients included and followed in the study are warmly thanked for their kind participation in this research. We are grateful to the dialysis and transplant unit personnel for their generous contribution and kind collaboration. Matthieu Thorin is acknowledged for his excellent technical assistance in ANGPTL2 measurements. MPD holds a scholarship from *la Société québécoise d'hypertension artérielle through contribution from Servier*; CF holds a scholarship from FRQ-S. Dr De Serres holds a Kidney Research Scientist Core Education and National Training Program (KRESCENT) scholarship supported by CIHR, Kidney Foundation of Canada and Canadian Society of Nephrology and from FRQ-S; Dr Agharazii is the nephrology research chair at Université Laval. This project was supported by the Canadian Institute of Health Research (MOP 133649 and 14496 to ET; NET-54008 (MA), the Heart & Stroke Foundation of Canada (MA), the Kidney Foundation of Canada (MA).

## DISCLOSURES

The authors declared no conflict of interest.

## REFERENCES

- Foley RN, Parfrey PS, Sarnak MJ. Epidemiology of cardiovascular disease in chronic renal disease. *J Am Soc Nephrol* 1998; 9(suppl 12):S16–S23.
- Go AS, Chertow GM, Fan D, McCulloch CE, Hsu CY. Chronic kidney disease and the risks of death, cardiovascular events, and hospitalization. *N Engl J Med* 2004; 351:1296–1305.
- Weiner DE, Tighiouart H, Amin MG, Stark PC, MacLeod B, Griffith JL, Salem DN, Levey AS, Sarnak MJ. Chronic kidney disease as a risk factor for cardiovascular disease and all-cause mortality: a pooled analysis of community-based studies. *J Am Soc Nephrol* 2004; 15:1307–1315.
- Blacher J, Guerin AP, Pannier B, Marchais SJ, London GM. Arterial calcifications, arterial stiffness, and cardiovascular risk in end-stage renal disease. *Hypertension* 2001; 38:938–942.
- Blacher J, Guerin AP, Pannier B, Marchais SJ, Safar ME, London GM. Impact of aortic stiffness on survival in end-stage renal disease. *Circulation* 1999; 99:2434–2439.
- Pannier B, Guérin AP, Marchais SJ, Safar ME, London GM. Stiffness of capacitive and conduit arteries: prognostic significance for end-stage renal disease patients. *Hypertension* 2005; 45:592–596.
- Miyazaki H, Matsuoka H, Itabe H, Usui M, Ueda S, Okuda S, Imaizumi T. Hemodialysis impairs endothelial function via oxidative stress: effects of vitamin E-coated dialyzer. *Circulation* 2000; 101:1002–1006.
- London GM, Pannier B, Agharazii M, Guerin AP, Verbeke FH, Marchais SJ. Forearm reactive hyperemia and mortality in end-stage renal disease. *Kidney Int* 2004; 65:700–704.
- Verbeke F, Van Biesen W, Honkanen E, Wikström B, Jensen PB, Krzesinski JM, Rasmussen M, Vanholder R, Rensma PL; CORD Study Investigators. Prognostic value of aortic stiffness and calcification for cardiovascular events and mortality in dialysis patients: outcome of the calcification outcome in renal disease (CORD) study. *Clin J Am Soc Nephrol* 2011; 6:153–159.
- Utescu MS, Couture V, Mac-Way F, De Serres SA, Marquis K, Larivière R, Desmeules S, Lebel M, Boutouyrie P, Agharazii M. Determinants of progression of aortic stiffness in hemodialysis patients: a prospective longitudinal study. *Hypertension* 2013; 62:154–160.
- Farhat N, Thorin-Trescases N, Mamarbachi M, Villeneuve L, Yu C, Martel C, Duquette N, Gayda M, Nigam A, Juneau M, Allen BG, Thorin E. Angiopietin-like 2 promotes atherogenesis in mice. *J Am Heart Assoc* 2013; 2:e000201.
- Yu C, Luo X, Farhat N, Daneault C, Duquette N, Martel C, et al. Lack of angiopoietin-like-2 expression limits the metabolic stress induced by a high-fat diet and maintains endothelial function in mice. *J Am Heart Assoc* 2014; 3:e001024.
- Horio E, Kadomatsu T, Miyata K, Arai Y, Hosokawa K, Doi Y, Ninomiya T, Horiguchi H, Endo M, Tabata M, Tazume H, Tian Z, Takahashi O, Terada K, Takeya M, Hao H, Hirose N, Minami T, Suda T, Kiyohara Y, Ogawa H, Kaikita K, Oike Y. Role of endothelial cell-derived angptl2 in vascular inflammation leading to endothelial dysfunction and atherosclerosis progression. *Arterioscler Thromb Vasc Biol* 2014; 34:790–800.
- Jung CH, Lee WJ, Lee MJ, Kang YM, Jang JE, Leem J, La Lee Y, Seol SM, Yoon HK, Park JY. Association of serum angiopoietin-like protein 2 with carotid intima-media thickness in subjects with type 2 diabetes. *Cardiovasc Diabetol* 2015; 14:35.
- Hata J, Mukai N, Nagata M, Ohara T, Yoshida D, Kishimoto H, Shibata M, Hirakawa Y, Endo M, Ago T, Kitazono T, Oike Y, Kiyohara Y, Ninomiya T. Serum angiopoietin-like protein 2 is a novel risk factor for cardiovascular disease in the community: the Hisayama study. *Arterioscler Thromb Vasc Biol* 2016; 36:1686–1691.
- Usui T, Ninomiya T, Nagata M, Takahashi O, Doi Y, Hata J, Fukuhara M, Kitazono T, Oike Y, Kiyohara Y. Angiopietin-like protein 2 is associated with chronic kidney disease in a general Japanese population: the Hisayama Study. *Circ J* 2013; 77:2311–2317.
- Gellen B, Thorin-Trescases N, Sosner P, Gand E, Saulnier P-J, Ragot S, et al. ANGPTL2 is associated with an increased risk of cardiovascular events and death in diabetic patients. *Diabetologia* 2016; 59:2321–2330.
- Ignace S, Utescu MS, De Serres SA, Marquis K, Gaudreault-Tremblay MM, Larivière R, Côté I, Houde I, Lebel M, Agharazii M. Age-related and blood pressure-independent reduction in aortic stiffness after kidney transplantation. *J Hypertens* 2011; 29:130–136.
- Larouche JF, Yu C, Luo X, Farhat N, Guiraud T, Lalongé J, Gayda M, Juneau M, Lambert J, Thorin-Trescases N, Thorin E, Nigam A. Acute high-intensity intermittent aerobic exercise reduces plasma angiopoietin-like 2 in patients with coronary artery disease. *Can J Cardiol* 2015; 31:1232–1239.
- Kim I, Moon SO, Koh KN, Kim H, Uhm CS, Kwak HJ, Kim NG, Koh GY. Molecular cloning, expression, and characterization of angiopoietin-related protein. angiopoietin-related protein induces endothelial cell sprouting. *J Biol Chem* 1999; 274:26523–26528.
- Thorin-Trescases N, Thorin E. Angiopietin-like-2: a multifaceted protein with physiological and pathophysiological properties. *Expert Rev Mol Med* 2014; 16:e17.
- Tabata M, Kadomatsu T, Fukuhara S, Miyata K, Ito Y, Endo M, Urano T, Zhu HJ, Tsukano H, Tazume H, Kaikita K, Miyashita K, Iwakawa T, Shimabukuro M, Sakaguchi K, Ito T, Nakagata N, Yamada T, Katagiri H, Kasuga M, Ando Y, Ogawa H, Mochizuki N, Itoh H, Suda T, Oike Y. Angiopietin-like protein 2 promotes chronic adipose tissue inflammation and obesity-related systemic insulin resistance. *Cell Metab* 2009; 10:178–188.
- Wang Z, Zheng H, Chen H, Lin X, Chen J, Wang L, Bao W, Lin X, Huang M, Luo Z. Elevated serum angiopoietin-like protein 2 in patients with acute coronary syndrome. *Arch Med Res* 2015; 46:257–264.
- Huang CL, Wu YW, Wu CC, Hwang JJ, Yang WS. Serum angiopoietin-like protein 2 concentrations are independently associated with heart failure. *PLoS One* 2015; 10:e0138678.
- Nguyen A, Mamarbachi M, Turcot V, Lessard S, Yu C, Luo X, Lalongé J, Hayami D, Gayda M, Juneau M, Thorin-Trescases N, Lettre G, Nigam A, Thorin E. Lower methylation of the ANGPTL2 gene in leukocytes from post-acute coronary syndrome patients. *PLoS One* 2016; 11:e0153920.
- Li Q, Gong W, Yang Z, Lu B, Yang Y, Zhao W, Hu R. Serum Angptl2 levels are independently associated with albuminuria in type 2 diabetes. *Diabetes Res Clin Pract* 2013; 100:385–390.
- Kalantar-Zadeh K, Ikizler TA, Block G, Avram MM, Kopple JD. Malnutrition-inflammation complex syndrome in dialysis patients: causes and consequences. *Am J Kidney Dis* 2003; 42:864–881.
- Aoi J, Endo M, Kadomatsu T, Miyata K, Nakano M, Horiguchi H, Ogata A, Odagiri H, Yano M, Araki K, Jinnin M, Ito T, Hirakawa S, Ihn H, Oike Y. Angiopietin-like protein 2 is an important facilitator of inflammatory carcinogenesis and metastasis. *Cancer Res* 2011; 71:7502–7512.

29. Aoi J, Endo M, Kadomatsu T, Miyata K, Ogata A, Horiguchi H, Odagiri H, Masuda T, Fukushima S, Jinnin M, Hirakawa S, Sawa T, Akaike T, Ihn H, Oike Y. Angiotensin-like protein 2 accelerates carcinogenesis by activating chronic inflammation and oxidative stress. *Mol Cancer Res* 2014; 12:239–249.
30. David S, Kumpers P, Hellpap J, Horn R, Leitolf H, Haller H, Kielstein JT. Angiotensin 2 and cardiovascular disease in dialysis and kidney transplantation. *Am J Kidney Dis* 2009; 53:770–778.
31. David S, Kumpers P, Lukasz A, Fliser D, Martens-Lobenhoffer J, Bode-Böger SM, Kliem V, Haller H, Kielstein JT. Circulating angiotensin-2 levels increase with progress of chronic kidney disease. *Nephrol Dial Transplant* 2010; 25:2571–2576.
32. Thorin-Trescases N, Thorin E. Lifelong cyclic mechanical strain promotes large elastic artery stiffening: increased pulse pressure and old age-related organ failure. *Can J Cardiol* 2016; 32:624–633.
33. Morinaga J, Kadomatsu T, Miyata K, Endo M, Terada K, Tian Z, Sugizaki T, Tanigawa H, Zhao J, Zhu S, Sato M, Araki K, Iyama K, Tomita K, Mukoyama M, Tomita K, Kitamura K, Oike Y. Angiotensin-like protein 2 increases renal fibrosis by accelerating transforming growth factor- $\beta$  signaling in chronic kidney disease. *Kidney Int* 2016; 89:327–341.
